# Supplementary material for: Nucleosome binding by TP53, TP63, and TP73 is determined by the composition, accessibility, and helical orientation of their binding sites
Source: HighWire-hosted journal article supplement (doi:10.1101/gr.279541.124), 2025-02-10
Supplement: supplemental_code.docx [file supplemental_code.docx]

**SUPPLEMENTAL CODE:**

The custom script used in the processing of Pioneer-seq data is provided below and is also available at: https://github.com/pwilson97/Pioneer-seq_snakemake

**Pioneer-seq data processing and alignment workflow**

This is a Snakemake workflow for automated processing and alignment of paired-end sequencing data derived from Pioneer-seq experiments.

Requirements:

- Snakemake and Conda must be installed.
- Demultiplexed paired-end reads in gzipped FASTQ format located in the raw_data/ directory.
- A Pioneer-seq reference library in FASTA format (“reference_libraries/ Nucs_v1_DB_no_primers.fa” is included in this repository)
- A snakefile (“snakefile”) is included in this repository.
- A config file (“config.json”) is included in this repository. This contains customizable parameters, such as file paths and processing options.
- Conda environment files (“envs/”) are included in this repository. These ensure that the correct software and versions are installed.
- A metadata file (“metadata.txt”, tab-delimited) is included in this repository. The metadata file serves as input for the workflow and describes the relationships between samples, replicates, and associated files.

Creating the conda environment:

Navigate to the root directory of this repository and run the following commands to create each environment:

conda env create --file envs/cutadapt.yaml --name cutadapt_env

conda env create --file envs/vsearch.yaml --name vsearch_env

conda env create --file envs/fastx.yaml --name fastx_env

Run the Snakemake pipeline with Conda:

Use the --use-conda flag when running Snakemake. This ensures that Snakemake automatically creates and activates the required environments for each rule:

snakemake --use-conda --cores 4

Script: config.json:

{

"metafile": "metafile.txt",

"raw_fastq_gz_dir": "raw_data/",

"ref_lib_dir": "reference_libraries/",

"dir_names":

{

"unzip_dir": "outputs/unzip",

"filter_dir": "outputs/filter",

"filter_log_dir": "outputs/filter/filter_logs",

"merge_dir": "outputs/merge",

"notmerge_dir": "outputs/merge/notmerge",

"merge_log_dir": "outputs/merge/merge_logs",

"trim_dir": "outputs/trim",

"trim_log_dir": "outputs/trim/trim_logs",

"restrict_dir": "outputs/restrict",

"restrict_log_dir": "outputs/restrict/restrict_logs",

"convert_dir": "outputs/convert",

"align_dir": "outputs/align",

"align_dbout_dir": "outputs/align/align_dbout",

"align_log_dir": "outputs/align/align_logs",

"matrix_dir": "outputs/matrix"

},

"envs":

{

"cutadapt": "envs/cutadapt.yaml",

"fastx": "envs/fastx.yaml",

"vsearch": "envs/vsearch.yaml"

},

"params":

{

"qscore": "30",

"maxdiffs": "2",

"minovlen": "20",

"pair1": "GATGGACCCTATACGCGGC...TGCCAGTCGGATAGTGTTCCAGGTTCAGAGG",

"pair2": "AGCTCGAGAACGATGGACCCTATACGCGGC...TGCCAGTCGGATAGTGTTCC",

"pair3": "CTGAATGATGGACCCTATACGCGGC...TGCCAGTCGGATAGTGTTCCAGAACAGTA",

"pair4": "TCACTCTTGATGGACCCTATACGCGGC...TGCCAGTCGGATAGTGTTCCCGTCCAT",

"minimum_length": "174",

"maximum_length": "195",

"global_clustering_threshold": "0.985",

"threads": "8",

"maxrejects": "0",

"maxaccepts": "0",

"qmask": "none",

"dbmask": "none",

"userfields": "query+target+id+alnlen+mism+opens+qlo+qhi+tlo+thi+evalue+bits",

"mincols": "150"

},

}

Script: cutadapt.yaml:

name: cutadapt-env

channels:

- bioconda

- conda-forge

dependencies:

- cutadapt=3.5

- python=3.9 # Ensures compatibility

Script: fastx.yaml:

name: fastx-env

channels:

- bioconda

dependencies:

- fastx_toolkit=0.0.14

Script: vsearch.yaml:

name: vsearch-env

channels:

- bioconda

dependencies:

- vsearch=2.8.1

Script: snakefile:

import pandas as pd

import os

configfile: "config.json"

df = pd.read_csv(config["metafile"], sep='\t', header=0, index_col=0, dtype={'Ratio': str})

samples = list(df.index)

df.index = samples

replicates = set(df["Replicate"])

def get_gz_pair(sample):

dir = config["raw_fastq_gz_dir"]

return tuple(os.path.join(dir + df.loc[str(sample), x]) for x in ('ForwardFastqGZ', 'ReverseFastqGZ'))

def get_ref_lib(sample):

dir = config["ref_lib_dir"]

return os.path.join(dir, df.loc[sample]["ReferenceLibrary"])

def get_userouts(replicate):

dir = config["dir_names"]["align_dir"]

samples = df.index[df["Replicate"] == replicate].tolist()

return [f"{dir}/{sample}.userout" for sample in samples]

def get_db(replicate):

dir = config["ref_lib_dir"]

db = df.loc[df["Replicate"] == replicate, "ReferenceLibraryDetails"].values[0]

return dir + db

def get_gelband_ratios(replicate):

gel_bands = df.loc[df["Replicate"] == replicate, "GelBand"].tolist()

ratios = df.loc[df["Replicate"] == replicate, "Ratio"].tolist()

return [gel_band + "_" + ratio for gel_band, ratio in zip(gel_bands, ratios)]

def get_protein(replicate):

protein = df.loc[df["Replicate"] == replicate, "Protein"].iloc[0]

return protein

rule all:

input:

expand("{dir}/{sample}.userout", dir=config["dir_names"]["align_dir"],sample=samples)

rule unzip:

input:

lambda wildcards: get_gz_pair(wildcards.sample)

output:

config["dir_names"]["unzip_dir"] + "/{sample}_R1.fastq",

config["dir_names"]["unzip_dir"] + "/{sample}_R2.fastq"

shell:

"gunzip -c {input[0]} > {output[0]} && gunzip -c {input[1]} > {output[1]}"

rule filter:

input:

rules.unzip.output

output:

config["dir_names"]["filter_dir"] + "/{sample}_R1.fq",

config["dir_names"]["filter_dir"] + "/{sample}_R2.fq"

conda:

config["envs"]["cutadapt"]

params:

qscore = config["params"]["qscore"]

log:

config["dir_names"]["filter_log_dir"] + "/{sample}_R1.txt",

config["dir_names"]["filter_log_dir"] + "/{sample}_R2.txt"

shell:

"cutadapt -q {params.qscore} -o {output[0]} {input[0]} | sed '1,6d' > {log[0]} && cutadapt -q {params.qscore} -o {output[1]} {input[1]} | sed '1,6d' > {log[1]} "

rule merge:

input:

rules.filter.output

output:

config["dir_names"]["merge_dir"] + "/{sample}.fq",

config["dir_names"]["notmerge_dir"] + "/{sample}_R1.fq",

config["dir_names"]["notmerge_dir"] + "/{sample}._R2.fq"

conda:

config["envs"]["vsearch"]

params:

maxdiffs = config["params"]["maxdiffs"],

minovlen = config["params"]["minovlen"]

log:

config["dir_names"]["merge_log_dir"] + "/{sample}.txt"

shell:

"vsearch --fastq_mergepairs {input[0]} --reverse {input[1]} --fastq_maxdiffs {params.maxdiffs} --fastq_minovlen {params.minovlen} --fastqout {output[0]} --fastaout_notmerged_fwd {output[1]} --fastaout_notmerged_rev {output[2]} &> {log}"

rule trim:

input:

rules.merge.output

output:

config["dir_names"]["trim_dir"] + "/{sample}.fq"

conda:

config["envs"]["cutadapt"]

params:

pair1 = config["params"]["pair1"],

pair2 = config["params"]["pair2"],

pair3 = config["params"]["pair3"],

pair4 = config["params"]["pair4"]

log:

config["dir_names"]["trim_log_dir"] + "/{sample}.txt"

shell: #not done yet; might go from four to one param

"cutadapt -a Pair_1={params.pair1} -a Pair_2={params.pair2} -a Pair_3={params.pair3} -a Pair_4={params.pair4} --discard-untrimmed -o {output} {input[0]} | sed '1,4d' > {log}"

rule restrict:

input:

rules.trim.output

output:

config["dir_names"]["restrict_dir"] + "/{sample}.fq"

conda:

config["envs"]["cutadapt"]

params:

min = config["params"]["minimum_length"],

max = config["params"]["maximum_length"]

log:

config["dir_names"]["restrict_log_dir"] + "/{sample}.txt"

shell:

"cutadapt -m {params.min} -M {params.max} -o {output} {input} | sed '1,4d' > {log}"

rule convert:

input:

rules.restrict.output

output:

config["dir_names"]["convert_dir"] + "/{sample}.fa"

conda:

config["envs"]["fastx"]

shell:

"fastq_to_fasta -n -i {input} -o {output}"

rule align:

input:

rules.convert.output,

lambda wildcards: get_ref_lib(wildcards.sample)

output:

config["dir_names"]["align_dir"] + "/{sample}.userout",

config["dir_names"]["align_dbout_dir"] + "/{sample}.dbout"

conda:

config["envs"]["vsearch"]

params:

id = config["params"]["global_clustering_threshold"],

threads = config["params"]["threads"],

maxrejects = config["params"]["maxrejects"],

maxaccepts = config["params"]["maxaccepts"],

qmask = config["params"]["qmask"],

dbmask = config["params"]["dbmask"],

userfields = config["params"]["userfields"],

mincols = config["params"]["mincols"]

log:

config["dir_names"]["align_log_dir"] + "/{sample}.txt"

shell:

"vsearch --usearch_global {input[0]} --db {input[1]} --dbmatched {output[1]} --sizeout --id {params.id} --threads {params.threads} --maxrejects {params.maxrejects} --maxaccepts {params.maxaccepts} --qmask {params.qmask} --dbmask {params.dbmask} --userfields {params.userfields} --userout {output[0]} --top_hits_only --mincols {params.mincols} &> {log}"
